# Supplementary material
Source: Springer Nature journal article supplement (https://www.springermedizin.de/resource/supplementary/13049_2013_828_MOESM3_ESM.pdf/9667242)

Numbers

■ Hypothermia (n=244)  
▨ Frostbite (n=105)  
▤ Drowning (n=56)

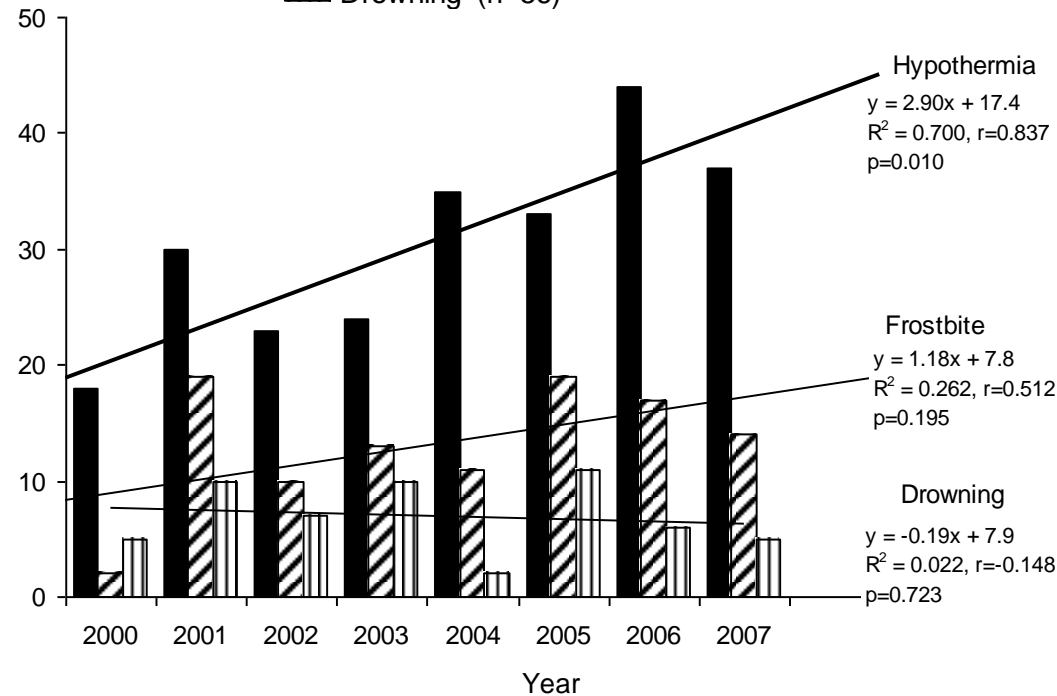

Supplement: MOESM3 [file 9667242]
